# Supplementary material for: Ultra-portable, wireless smartphone spectrometer for rapid, non-destructive testing of fruit ripeness
Source: PubMed Central journal article supplement (PMC5015488; doi:10.1038/srep32504), 2016-09-08
Supplement: srep32504-s1.pdf [file srep32504-s1.pdf]

# Ultra-portable, wireless smartphone spectrometer for rapid, non-destructive testing of fruit ripeness

Anshuman J. Das, Akshat Wahi, Ishan Kothari and Ramesh Raskar

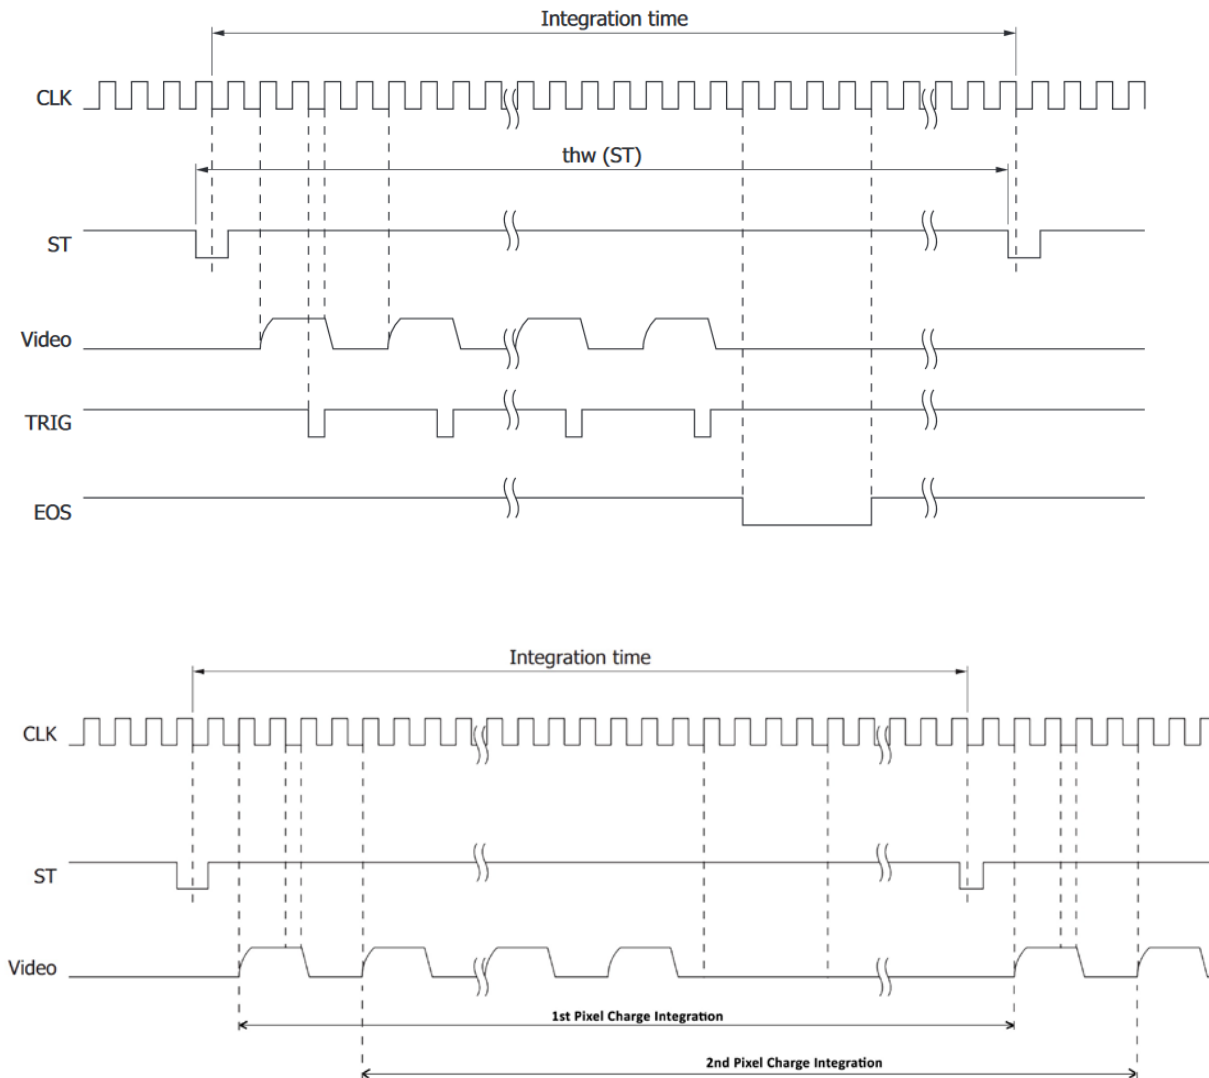

Supplementary Fig. S1: Timing diagram of the spectrometer showing the various signal involved in the operation.

(Adapted from- [http://www.hamamatsu.com/resources/pdf/ssd/c12666ma\\_kacc1216e.pdf](http://www.hamamatsu.com/resources/pdf/ssd/c12666ma_kacc1216e.pdf))

Supplementary Table T1: Calibration coefficients for the spectrometer

| Coefficient | Value             |
|-------------|-------------------|
| A0          | 2.988204530e+002  |
| B1          | 2.402512393e+000  |
| B2          | -9.234466848e-004 |
| B3          | -4.648308454e-006 |
| B4          | 2.090258796e-010  |
| B5          | 1.496304653e-011  |

Note: These coefficients vary for every spectrometer chip. The actual coefficients can be found in the test sheet accompanying the product.
